# Supplementary material for: Experimental and theoretical studies on the mechanism for chemical oxidation of multiwalled carbon nanotubes
Source: Royal Society of Chemistry journal article supplement (doi:10.1039/c4ra03881a), 2014-01-01
Supplement: c4ra03881a1.pdf [file c4ra03881a1.pdf]

## Supporting Information

### **Experimental and theoretical studies on the mechanism for chemical oxidation of multiwalled carbon nanotubes**

**B.M. Maciejewska\*<sup>1,2</sup>, M. Jasiurkowska-Delaporte\*<sup>1</sup>, A.I. Vasylenko<sup>3</sup>, K.K. Koziol<sup>4</sup>,**

**S. Jurga<sup>1,2</sup>**

*<sup>1</sup>NanoBioMedical Center, Adam Mickiewicz University, Umultowska 85, 61-614 Poznań, Poland*

*<sup>2</sup>Department of Macromolecular Physics, Faculty of Physics, Adam Mickiewicz University Umultowska 85, 61-614 Poznań, Poland*

*<sup>3</sup>Institute for Condensed Matter Physics, National Academy of Science of Ukraine, 1 Svetsitskogo Str., 79011 Lviv, Ukraine*

*<sup>4</sup>University of Cambridge, Department of Materials Science and Metallurgy, 27 Charles Babbage Road, Cambridge CB3 0FS, United Kingdom*

#### **1. Morphology studies**

TEM micrographs of MWCNTs treated by two different oxidation methods are shown on Figure 1. The oxidation effect (qualitative and quantitative) cannot be distinguished very well, however a higher number of exfoliated O-MWCNTs was observed after reflux treatment comparing to other protocols described in this work.

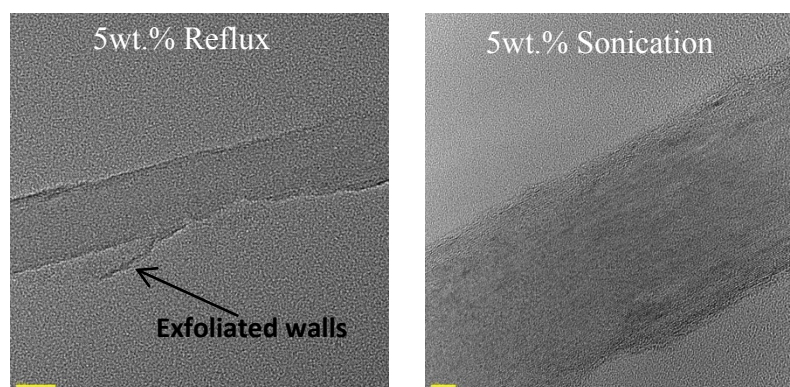

**Figure 1. TEM micrographs of MWCNTs (with 5wt.% of iron catalyst) oxidized by two different methods: reflux and sonication treatment.**

#### **1. Separation protocols**

The length separation method for all oxidized samples was completed using centrifugation procedure. Figure 2 shows SEM micrographs of separated O-MWCNTs. The accurate length statistics based on SEM technique was completed.

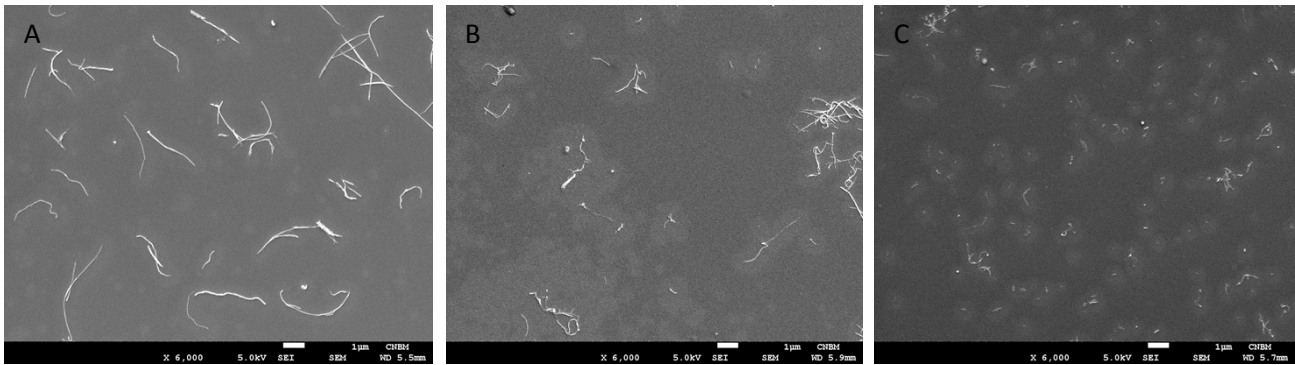

**Figure 2. Three different sizes of refluxed oxidized 2%-MWCNTs for sample after separation.**

## 2. Thermal Analysis

Thermal analysis allows to examine the existence of different functionalities on the MWCNT outerwalls. The thermal analysis was carried out in the range of temperature from 20°C to 1000°C with 5°C step in air. Mass loss in the vicinity of 127°C corresponds to evaporation of the adsorbed water within the sample, whereas the weight loss at 400°C is caused by elimination of hydroxyl functionalities attached to the MWCNT walls. Finally, at 600°C thermal oxidation of amorphous carbon residues occurs [1,2](Figure 3).

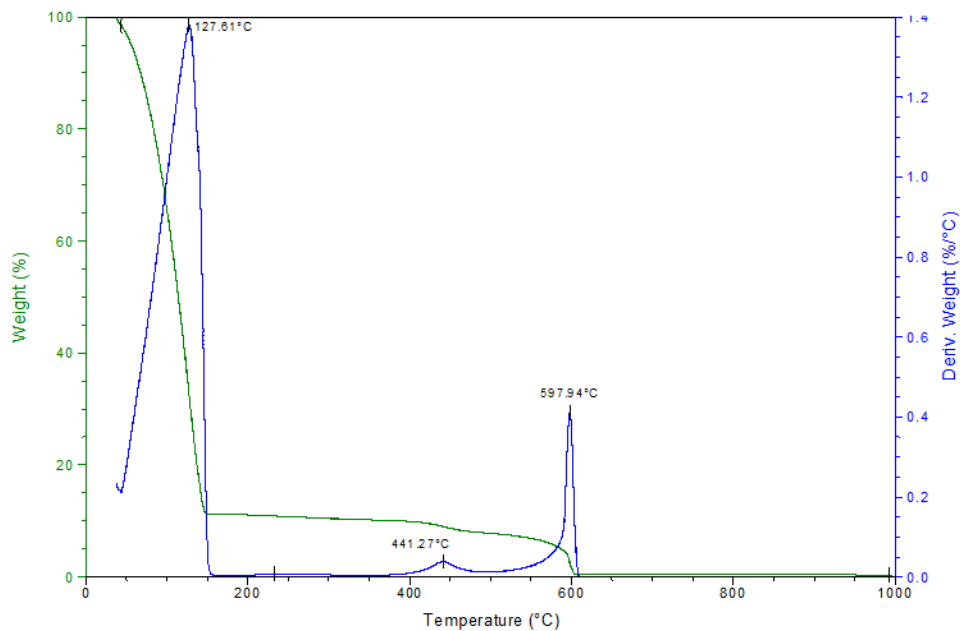

**Figure 3. An example of thermal analysis data for O-MWCNTs with 5wt.% of catalyst after reflux treatment.**

References:

- [1] Krzysztof Koziol, Ph.D. Thesis, Carbon nanotube polymer scaffolds, University of Cambridge, Cambridge, UK
- [2] F. Yang, M. Zhao, B. Zheng, D. Xiao, Li Wu, Y. Guo Influence of pH on the Fluorescence Properties of Graphene Quantum Dots Using Ozonation Pre-oxide Hydrothermal Synthesis., *J. Mater. Chem.*, 2012, 22, 25471–25479. (see Supporting Information).
